# Supplementary material
Source: PubMed Central journal article supplement (PMC2889327)
Supplement: 0913302107_pnas.0913302107_SI.pdf [file 0913302107_pnas.0913302107_SI.pdf]

# Supporting Information

Chang et al. 10.1073/pnas.0913302107

## SI Text

**Materials and Methods. Protein expression and purification.** The biofilm-forming *S. epidermidis* strain ATCC 35984 (RP62A) was obtained from the Food Industry Research and Development Institute in Taiwan. The *TcaR* gene was amplified directly from the *S. epidermidis* RP62A genome by polymerase chain reaction (PCR) with forward 5'-GGAATCCATATGCACCACCAC-CACCACCACATGGTAAGAAGAATAG-AA GATCACATC-3' and reverse 5'-CCCAGCTTCA AAGTTTAGAAGTATAA-GATTGTAT-3' primers. The PCR product encoding *TcaR* with an amino-terminal His<sub>6</sub> tag was digested with *NdeI* and *HindIII* and subsequently cloned into expression vector pET-21 (Novagen). This construct was transferred into *Escherichia coli* of Arctic Express™ (DE3) RIL strain. DNA sequencing was performed to confirm the appropriate orientation. The His<sub>6</sub>-tagged wild-type protein was overexpressed in Difco Luria-Bertani (LB) broth containing 50 mg/L ampicillin to an optical density at 600 nm of 0.5–0.6 and then induced with 0.5 mM IPTG. Cells were grown for 2 days at 13 °C. The cells were then harvested by centrifugation at 12000 g for 30 min and disrupted by Constant Cell Disruption System (Constant System Ltd) with lysis buffer containing 20 mM Tris-HCl (pH 8.5), 400 mM NaCl, and 10 mM imidazole. The homogenate was centrifuged at 27,000 g for 30 min and the cell-free extract was loaded onto a Ni<sup>2+</sup>-NTA column, which had been previously equilibrated with lysis buffer. The column was washed with lysis buffer, and the His<sub>6</sub>-tagged *TcaR* was subsequently eluted by a linear gradient of imidazole from 10 mM to 500 mM. The fractions containing purified *TcaR* were collected and dialyzed against three 5 liters of buffer (first, 20 mM sodium citrate, 10% glycerol, 300 mM NaCl, pH 4.5; second, 20 mM sodium citrate, 10% glycerol, 200 mM NaCl, pH 4.5; third, 20 mM sodium citrate, 10% glycerol, 100 mM NaCl, pH 4.5), subsequently for 6 h. The purified His<sub>6</sub>-tagged *TcaR* was finally concentrated by 3 kDa cut-off size membrane of Amicon ultra-15 centrifugal filter units (Millipore) for storage at –80 °C. The molecular weight of the purified protein was verified by mass spectrometry, and the purity (>95%) was measured by SDS-PAGE.

SeMet-labeled *TcaR* was overexpressed in slightly modified SeMet minimal medium containing 100 mg/L ampicillin at 13 °C for 2 days with 0.5 mM IPTG as an inducer (1). The detailed protocol as follows: 200 mL overnight culture of M9 medium (Na<sub>2</sub>HPO<sub>4</sub> 6 g/L, KH<sub>2</sub>PO<sub>4</sub> 3 g/L, NaCl 0.5 g/L, NH<sub>4</sub>Cl 1 g/L, 2 mM MgSO<sub>4</sub>, 0.1 mM CaCl<sub>2</sub>, 0.4% glucose) of a single transformant was used to inoculate 6 liters of fresh M9 medium containing 100 g/L ampicillin at 37 °C until OD 0.6 at 600 nm, and then cooled to 13 °C. A 120 mL filter-sterilized solution containing 60 mg Fe<sub>2</sub>(SO<sub>4</sub>)<sub>3</sub> and 60 mg thiamine and 600 mg DL-SeMet was divided equally among the 6 l medium. One hour later IPTG was added to a final concentration of 0.5 mM for 2 days induction. Purification of the SeMet–*TcaR* was performed using the same protocol established for native *TcaR*. The purified protein was concentrated and stored at –80 °C.

**Crystallization and data collection.** For crystallization, *TcaR* and SeMet–*TcaR* solutions were adjusted to 18 mg/mL in 20 mM sodium citrate, 10% glycerol, 100 mM NaCl, pH 4.5 containing 5 mM DTT. The crystals of *TcaR* and SeMet–*TcaR* were obtained with 0.1 M Na-Hepes, pH 7.5, approximately 8–14% PEG4000 and approximately 10–13% 2-propanol precipitant solution. High-quality crystals were grown to full size within 2 days at room temperature. For the ligand-bound crystal forms, the crystals of

native *TcaR* were soaked for 1 h in a solution consisting of 75% mother liquor/25% glycerol/1 mM ligand. The X-ray diffraction data for the Se-Met-labeled *TcaR* were collected at Spring-8 (Hyogo, Japan), beamline BL12B2 and the native *TcaR* data were collected for improving resolution at the National Synchrotron Radiation Research Center (NSRRC), BL13B1. All diffraction images were recorded using ADSD Q315 CCD detector and the data were processed and scaled by using the program package of HKL2000 (2). The data collection statistics are summarized in Tables S1 and S2.

**Electrophoretic mobility shift assays (EMSA).** There are three fragments of possible *TcaR* binding DNA which were purchased from MDBio Inc.. The three DNA fragments are 33-mer DNA oligonucleotides within the *ica* promoter, labeled as DNA1, DNA2, and DNA3 (Table 1). Double-stranded DNA were prepared by annealing complementary oligonucleotides (100 mM each) in 10 mM Tris-HCl, pH 8.0, 20 mM NaCl, heating the reaction to 95 °C for 5 min and allowing it to cool to 25 °C. A 30 μL binding reaction containing 1–4 μM of purified recombinant *TcaR* and 1 μM of various dsDNA substrates in binding buffer (20 mM Tris-HCl, pH 8.0, 150 mM KCl, 0.1 mM MgCl<sub>2</sub>, 0.05 mM EDTA, 12.5% Glycerol, 10 mM DTT and 1 mg/mL BSA) was incubated at room temperature with gentle vortex for 15 min. After incubation, 15 μL of the reaction solution was mixed with 3 μL of the sample loading dye and subsequently loaded onto a 6% non-denaturing polyacrylamide gel and electrophoresed in 1/2 Tris/acetate/EDTA (TAE) at 100 V for 30 min and visualized using SYBR Green I nucleic acid gel stain (Invitrogen). In the assay for effects of antibiotics on the interaction of *TcaR* and DNA, DNA1 probe of 1 μM was preincubated with 2 μM *TcaR* (dimer) at room temperature for 15 min before mixing with 2 μM antibiotics, followed by the same procedure as in the other assays.

**Computer modeling.** Because *TcaR* structure is similar to other MarR family proteins, the structure of the OhrR-DNA complex from PDB 1Z9C was used as a template to construct a model of *TcaR*-DNA complex. The 29 bp pseudopalindromic DNA sequence of 1Z9C was mutated to the sequence of Consensus 1 (Table S1) that was used in the EMSA experiment (see below). Using the program O, the new base pairs were positioned as close as possible to match those in the template, whereas the sugar phosphate backbone remained unscathed. Molecular dynamics and energy minimization were subsequently carried out using CNS, with atomic positions of both the protein and the DNA tethered to the originals by applying a moderate harmonic restraint.

**Quantitative biofilm assay.** To assess biofilm formation, inoculums of *S. epidermidis* RP62A was prepared in LB as described previously (3), and incubated for 18 h at 37 °C on a shaker at 200 rpm. The inoculums was diluted 1:20 times in tryptic soy broth (TSB) for *S. epidermidis* and 190 μL each was aliquoted per well on a 96-well polystyrene microtiter plate, and 10 μL each of appropriately concentrated antibiotic was added to each well of 96-well plate. The microtiter plate was incubated at 37 °C. After 24 h incubation, the medium was gently removed and the microtiter plate wells were washed three times with PBS (0.1 M, pH 7.4) buffer. The microtiter plate wells were stained with 200 μL of 0.4% crystal violet for 15 min at room temperature. The unbound crystal violet was removed and the wells were washed gently three times with 200 μL of PBS buffer. The wells were air-dried for 15 min

and the crystal violet in each well was solubilized by adding 200  $\mu$ L of 95% ethanol. The plate was read at 570 nm using microtiter plate reader.

**Protein Data Bank accession codes.** The atomic coordinates and structure factors for the native TcaR crystal, TcaR-Sal, TcaR-Amp, TcaR-Kan, TcaR-Meth, and TcaR-PnG have been deposited in the wwPDB with accession numbers of 3KP7, 3KP6, 3KP3, 3KP5, 3KP4, and 3KP2, respectively.

**Sequence alignment of TcaR.** The structure of TcaR was searched against the PDB using the DALI program to identify structural homologs (4). Numerous DNA-binding proteins were identified from this analysis, with the MarR family protein from *Bacillus stearothermophilus* (PDB ID: 2RDP) being the closest structural match with a Z score of 15.6 followed by a Z score of 14.0 for MarR family protein from *Silicibacter pomeroyi* (PDB ID: 3BJ6), a Z score of 14.0 for hypothetical MarR family protein from *Sulfolobus tokodaii* (PDB ID: 2EB7) (5), a Z score of 14.0 for MarR family protein from *Xanthomonas campestris* (PDB ID: 2FA5) (6), and a Z score of 12.5 for the MarR protein from *E. coli* (PDB ID: 1JGS) (7). The Z score is a measure of structural similarity, with increasing value indicating higher level of structural conservation. The three-dimensional structure of TcaR superposed with the MarR family protein structures from *B. stearothermophilus*, *S. pomeroyi*, *S. tokodaii*, *X. campestris*, and *E. coli* with rmsd values of 3.7, 10.6, 3.5, 4.4, and 4.3 Å, respectively, between the structurally equivalent C $\alpha$  positions. Although these scores reflect the overall structure similarity between TcaR and these proteins, their amino acid sequences do not share obvious similarities (Fig. S1).

**TcaR-DNA complex modeling.** Superposition of the TcaR dimer with the OhrR-ohrA operator complex revealed a similar overall topology. Moreover, it is interesting to note that the DNA contacting residues of the wHTH domain in the OhrR protein are highly conserved in TcaR. Superposition of the TcaR wHTH domain ( $\alpha$ 2- $\alpha$ 3- $\alpha$ 4- $\beta$ A-W1- $\beta$ B) onto the OhrR wHTH domain ( $\alpha$ 2- $\beta$ 1- $\alpha$ 3- $\alpha$ 4- $\beta$ 2-W1- $\beta$ 3) showed rmsd of 0.864 Å. Therefore, the DNA binding domain of OhrR was used as a reference when we build the model of the wHTH region in TcaR. We used the crystal structure of OhrR-DNA complex (PDB 1Z9C) as a template to construct a model of TcaR-DNA complex. The double strand sequence Consensus1 as derived from the EMSA results below is shown in Fig. S2B, and an overview of modeled TcaR-DNA complex is shown in Fig. S2A. In this model, two continuous major grooves of the DNA were bound by the helices of the wHTH motif in TcaR. Another DNA-binding element, the wing, is composed of  $\beta$ -strands and loops which interact with the minor groove of the DNA. Interestingly, Asp92 and Arg94 in the OhrR-DNA complex, equivalent to Asp91 and Arg93 in TcaR, also interact with the minor groove of the DNA. We have noticed that these two residues are highly conserved in the MarR family proteins and the Blal protein. The previous mutation experiments revealed that Arg94 of *E. coli* MarR and Arg91 of *P. aeruginosa* MexR are important for their DNA-binding affinity (7, 8). Therefore, one of the key residues for the DNA-binding ability of TcaR should be Arg93. In addition, another TcaR-DNA model derived from an alternatively predicted DNA sequence was shown in Fig. S2C. Taken together, the complex model suggests that TcaR may recognize its operator DNA by using the same repertoire of interactions of OhrR, with slight variations. Further investigation is needed to elucidate the interaction-forming residues in TcaR.

**Comparison of the MarR-salicylate complex structures.** The TcaR-Sal complex structure revealed that a large portion of the hinge region between the DNA-binding and the dimerization domains

form the hydrophobic ligand binding pocket. The detailed interactions of SAL1-8 are shown in Fig. S5B-I. In each of these sites, the salicylate ring sits over a hydrophobic side chain in the pocket. There are three MarR family protein-salicylate complex structures available up to now: *E. coli* MarR (7), *M. thermoautotrophicum* MTH313 (9), and *S. tokodaii* ST1710 (10). Comparison of these salicylate complexes with TcaR revealed that the overall topology is similar (Fig. S5A). The salicylate ligands in *E. coli* MarR are highly solvent exposed, which may be important in stabilizing crystal contacts. On the other hand, the ligands in MTH313 and ST1710 both locate toward the  $\alpha$ 5 helix upon binding. However, TcaR is the one with the most numerous salicylate binding sites and those sites are distinct from other MarR family protein structures solved. Three salicylates (SAL2, SAL3, and SAL4) interact with TcaR within the dimerization domain, one (SAL6) is partially solvent exposed close to the DNA-binding domain, and the other four are bound directly at the junction of the DNA binding and the dimerization domains. Consequently, this observation supports our EMSA studies in which a higher molar ratio of salicylate is needed to occupy all the SAL binding pockets to inactivate TcaR effectively compared with other antibiotics tested. Moreover, because the binding sites of salicylate that we observed are numerous and nonspecific, it seems like salicylate is able to interact, perhaps weakly, with many proteins that possess suitable hydrophobic cavities and thereby influence the biological function of those proteins. This might explain the broad physiological effects of aspirin.

**Crystal structure of TcaR complexed with ampicillin.** Ampicillin (Amp) is similar to PnG in its bactericidal action against susceptible organisms during the stage of active multiplication. It acts through the inhibition of cell wall mucopeptide biosynthesis (11). Amp has a broad spectrum of bactericidal activity against many gram-positive and gram-negative aerobic and anaerobic bacteria, however, as with other penicillin drugs, it is often resisted by Gram-positive *staphylococci*, including *S. epidermidis* (12). Here, we solved the structure of the TcaR-Amp complex to 3.2 Å resolution by molecular replacement and refined to a  $R_{\text{work}}/R_{\text{free}}$  of 24.7%/27.4% (Table S2). Comparison of apo TcaR with the TcaR-Amp complex reveals a large conformational change in the DNA binding domain, especially on chain B (Fig. S4 A and B). Interestingly, the shrinkage of distance between two DNA-binding domains in the TcaR-Amp complex is more dramatic than those in the PnG and salicylate complexes, with the distance between the N termini of the  $\alpha$ 4/ $\alpha$ 4' helices from 31.2 Å for the TcaR-DNA model to 22.5 Å for the TcaR-Amp complex (C $\alpha$ -C $\alpha$  distance between Lys A65 and Lys B65), and the C termini of the  $\alpha$ 3/ $\alpha$ 3' helices from 26.0 Å for the TcaR-DNA model to 15.9 Å for the TcaR-Amp complex (C $\alpha$ -C $\alpha$  distance between Asn A61 and Asn B61). These steric movements may produce a protein conformational incompatible with DNA binding activity. Surprisingly, both of the two molecules of Amp are located in chain B, an observation that is different from other antibiotics that we have tested in this work. For a detailed description of the interaction profiles, please see Fig. S6 A and B.

**Crystal structure of TcaR complexed with methicillin.** Like the function of other beta-lactam antibiotics, methicillin (Meth) works by inhibiting the synthesis of bacterial cell walls. It inhibits cross-linkage between the linear peptidoglycan polymer chains that make up a major component of the cell wall of Gram-positive bacteria such as *S. aureus* that would otherwise be resistant to most penicillins (13). Meth is insensitive to  $\beta$ -lactamase (also known as penicillinase) enzymes secreted by many penicillin-resistant bacteria. The presence of the *ortho*-dimethoxyphenyl group directly attached to the side chain carbonyl group of the penicillin nucleus facilitates the  $\beta$ -lactamase resistance, because those enzymes are relatively intolerant of side chain steric

hindrance. However, strains of Meth-resistant *S. aureus* and Meth-resistant coagulase-negative *staphylococci* have spread worldwide and have become established outside of the hospital environment, particularly among patients in chronic care facilities and in parenteral drug abusers (14, 15). Our gel-mobility analysis confirmed the ability of Meth to interact with TcaR and to inhibit protein–DNA complex formation. To see how Meth binds to TcaR, we determined the TcaR–Meth complex at a resolution of 2.84 Å, and refined to a final  $R_{\text{work}}$  value of 23.6% and an  $R_{\text{free}}$  value of 25.6% (Table S2). This is the first Meth–protein complex in the Protein Data Bank. The overall conformation of the complex is similar to apo TcaR structure, with an rmsd of 1.35 Å for superposition of 278 C $\alpha$  atoms (Fig. S4 *A* and *B*). Nevertheless, a major conformational change was observed in the DNA binding wHTH motifs that twist with the respect to each other to produce a sheared orientation with the most contracted distance between the N termini of the  $\alpha 4/\alpha 4$  helices to 21.1 Å for the TcaR–Meth complex (C $\alpha$ –C $\alpha$  distance between Lys A65 and Lys B65), and the C termini of the  $\alpha 3/\alpha 3$  helices to 15.3 Å for the TcaR–Meth complex (C $\alpha$ –C $\alpha$  distance between Asn A61 and Asn B61). It suggests a mode of regulation in which DNA binding is prevented by steric occlusion on the DNA–TcaR interface. This asymmetric structural change caused by two separate Meth binding sites is similar to the conformational change seen in other TcaR–antibiotic complexes. The detailed interactions of Meth1 and Meth2 are shown in Fig. S6 *C* and *D*.

**Crystal structure of TcaR complexed with kanamycin.** Kanamycin (Kan) is an aminoglycoside antibiotic which works by affecting

the 30S ribosomal subunit and causing a frameshift mutation to suppress the translation of RNA. In addition, it is an anti-infective drug used for treatment of infections when penicillin or other less toxic drugs do not work (16). It is known that Gram-positive *staphylococci* including *S. epidermidis* is resistant to Kan by producing a variety of mechanistically different aminocyclitol-modifying enzymes including the aminocyclitol-3'-phosphotransferase (APH[3']-III) (17). However, The mechanism of how the MarR family proteins regulate the gene encoding APH[3']-III remains unclear. Here, we solved the TcaR–Kan complex to a resolution of 2.90 Å and refined to a final  $R_{\text{work}}/R_{\text{free}}$  value of 23.3% and 27.6%, respectively (Table S2). In the overall structure of TcaR–Kan complex shown in Fig. 3*E*, we observed two Kan binding sites that are in the relative binding position as seen in the previous discussed antibiotic. The conformational change caused by Kan is similar to other TcaR–antibiotics complexes discussed above, which show dramatic conformational change in the DNA binding domain, especially in chain B (rmsd values of 1.0 on chain B and 0.7 on chain A) (Fig. S4 *A* and *B*). These conformational changes shorten the C- termini of the  $\alpha 3/\alpha 3$  helices from 26.0 Å for the TcaR–DNA model to 15.8 Å for the TcaR–Kan complex (C $\alpha$ –C $\alpha$  distance between Asn AZA61 and Asn B61) and the N termini of the  $\alpha 4/\alpha 4$  helices from 31.2 Å for the TcaR–DNA model to 22.0 Å for the TcaR–Kan complex (C $\alpha$ –C $\alpha$  distance between Lys A65 and Lys B65), forming a winged helix lobe orientation that is incompatible with DNA binding. For more detailed interaction information of Kan1 and Kan2, please refer to Fig. S6 *E* and *F*.

- Guerrero SA, Hecht HJ, Hofmann B, Biebl H, Singh M (2001) Production of selenomethionine-labeled proteins using simplified culture conditions and generally applicable host/vector systems. *Appl Microbiol Biotechnol* 56(5–6):718–723.
- Otwinowski Z, Minor W (1997) Processing of X-ray diffraction data collected in oscillation mode. *Method Enzymol* 276:307–326.
- Wakimoto N, et al. (2004) Quantitative biofilm assay using a microtiter plate to screen for enteroaggregative *Escherichia coli*. *Am J Trop Med Hyg* 71(5):687–690.
- Holm L, Sander C (1993) Protein structure comparison by alignment of distance matrices. *J Mol Biol* 233(1):123–138.
- Chin KH, et al. (2006) The crystal structure of XC1739: A putative multiple antibiotic-resistance repressor (MarR) from *Xanthomonas campestris* at 1.8 Å resolution. *Proteins* 65(1):239–242.
- Martin RG, Rosner JL (1995) Binding of purified multiple antibiotic-resistance repressor protein (MarR) to *mar* operator sequences. *Proc Natl Acad Sci USA* 92(12):5456–5460.
- Alekshun MN, Levy SB, Mealy TR, Seaton BA, Head JF (2001) The crystal structure of MarR, a regulator of multiple antibiotic resistance, at 2.3 Å resolution. *Nat Struct Biol* 8(8):710–714.
- Saito K, Akama H, Yoshihara E, Nakae T (2003) Mutations affecting DNA-binding activity of the MexR repressor of *mexR-mexA-mexB-oprM* operon expression. *J Bacteriol* 185(20):6195–6198.
- Saridakis V, Shahinas D, Xu X, Christendat D (2008) Structural insight on the mechanism of regulation of the MarR family of proteins: High-resolution crystal structure of a transcriptional repressor from *Methanobacterium thermoautotrophicum*. *J Mol Biol* 377(3):655–667.
- Kumarevel T, Tanaka T, Umehara T, Yokoyama S (2009) ST1710–DNA complex crystal structure reveals the DNA binding mechanism of the MarR family of regulators. *Nucleic Acids Res* 37(14):4723–4735.
- Chambers HF, Kartalija M, Sande M (1995) Ampicillin, sulbactam, and rifampin combination treatment of experimental methicillin-resistant *Staphylococcus aureus* endocarditis in rabbits. *J Infect Dis* 171(4):897–902.
- Gedikoglu Y, Colak A, Benli K, Erbenli T (1993) Efficacy of ampicillin/sulbactam combination in experimental shunt infections caused by *Staphylococcus epidermidis*. A light and scanning electron microscope study. *J Neurosurg Sci* 37(1):19–23.
- Roncoroni AJ, Schuster M, Bianchini HM, Damiano C (1983) Resistance of *Staphylococcus aureus* to methicillin. *Rev Argent Microbiol* 15(4):227–231.
- Chambers HF (1997) Methicillin resistance in *staphylococci*: Molecular and biochemical basis and clinical implications. *Clin Microbiol Rev* 10(4):781–791.
- Martins A, Cunha Mde L (2007) Methicillin resistance in *Staphylococcus aureus* and coagulase-negative *Staphylococci*: Epidemiological and molecular aspects. *Microbiol Immunol* 51(9):787–795.
- Brewer NS (1977) Antimicrobial agents—Part II. The aminoglycosides: streptomycin, kanamycin, gentamicin, tobramycin, amikacin, neomycin. *Mayo Clin Proc* 52(11):675–679.
- Gray GS, Fitch WM (1983) Evolution of antibiotic resistance genes: the DNA sequence of a kanamycin resistance gene from *Staphylococcus aureus*. *Mol Biol Evol* 1(1):57–66.







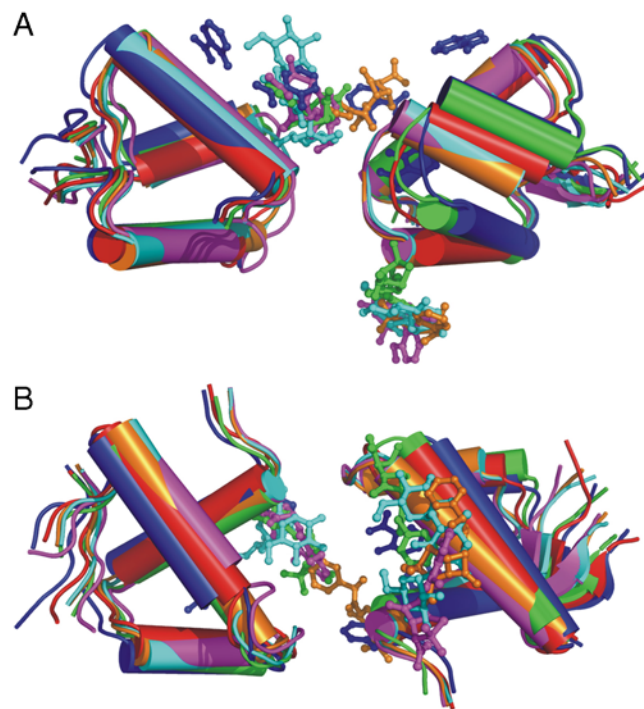

**Fig. S4.** (A) The enlargement of Fig. 3E showing the significant conformational change details at the WHTH domain. (B) The bottom view of (A).







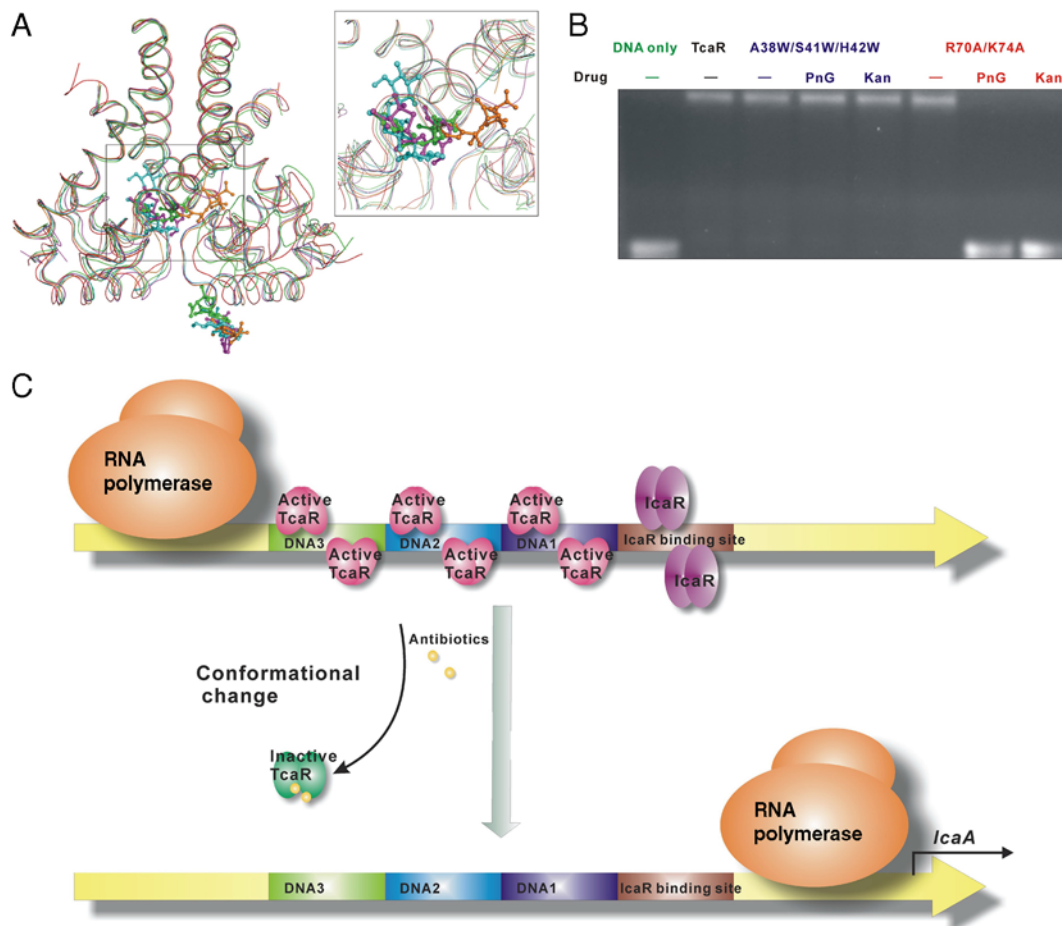

**Fig. 57.** (A) Superimposition of the apo (red) and the antibiotics-complexed structure of TcaR is shown as a worm tracing. The TcaR complexes of PnG (green), Amp (orange), Meth (magenta), and Kan (cyan) revealed a significant conformational change at the WH domain. The box in the upper right corner is the enlargement of the small box in center. (B) The effect of antibiotics on the TcaR mutant–DNA1 interaction. DNA1 probe duplex of 1  $\mu$ M was preincubated with 4  $\mu$ M of each TcaR mutant (dimer) at room temperature for 15 min before mixing with 4  $\mu$ M antibiotics, followed by the same procedure done in the previous gel shift assays. (C) Illustration of the *IcaA* regulation mechanism. Under noninducing conditions, the active forms of TcaR and IcaR are capable of interaction with the *ica* operator and preventing transcription of *IcaA*. Upon entering of some antibiotics to the cell, significant conformational changes in the DNA binding domains of TcaR and IcaR will be exerted, inducing the inactivation and the departure of these transcriptional repressors from the *ica* promoter, thus increasing the expression of *IcaA*.



**Table S2. Data collection and refinement statistics for the *S. epidermidis* TcaR crystals**

| Names                               | TcaR–Sal               | TcaR–Amp               | TcaR–Kan               | TcaR–Meth              | TcaR–Png               |
|-------------------------------------|------------------------|------------------------|------------------------|------------------------|------------------------|
| PDB number                          | 3KP6                   | 3KP3                   | 3KP5                   | 3KP4                   | 3KP2                   |
| Data collection                     |                        |                        |                        |                        |                        |
| Space group                         | P6 <sub>1</sub>        |
| Resolution (Å)*                     | 30-2.45<br>(2.54-2.45) | 30-3.20<br>(3.31-3.20) | 30-2.90<br>(3.00-2.90) | 30-2.84<br>(2.94-2.84) | 30-2.55<br>(2.64-2.55) |
| Unit cell dimensions                |                        |                        |                        |                        |                        |
| <i>a</i> = <i>b</i> (Å)             | 105.4                  | 108.0                  | 107.8                  | 107.6                  | 106.8                  |
| <i>c</i> (Å)                        | 52.0                   | 49.8                   | 49.4                   | 49.4                   | 46.4                   |
| No. of reflections                  |                        |                        |                        |                        |                        |
| Observed                            | 170071(12386)          | 18792(1808)            | 49797(1926)            | 36359(3553)            | 55516(5247)            |
| Unique                              | 12192(1126)            | 5615(548)              | 7318(642)              | 7703(756)              | 9969(990)              |
| Completeness (%)                    | 99.0(93.1)             | 99.8(100.0)            | 98.6(89.9)             | 97.9(98.3)             | 99.8(100.0)            |
| <i>R</i> <sub>merge</sub> (%)       | 7.3(55.1)              | 6.8(45.3)              | 6.5(40.1)              | 6.3(50.0)              | 6.2(40.0)              |
| <i>I</i> / $\sigma$ ( <i>I</i> )    | 34.3(2.1)              | 19.2(2.9)              | 27.2(2.6)              | 22.7(3.0)              | 35.8(5.0)              |
| Refinement                          |                        |                        |                        |                        |                        |
| No. of reflections                  | 11500(934)             | 5348(499)              | 7048(604)              | 7384(663)              | 9688(894)              |
| <i>R</i> <sub>work</sub> (95% data) | 23.4(31.1)             | 24.7(31.6)             | 23.3(30.6)             | 23.6(27.9)             | 23.3(28.5)             |
| <i>R</i> <sub>free</sub> (5% data)  | 27.1(31.2)             | 27.4(35.9)             | 27.6(51.5)             | 25.6(33.1)             | 27.1(35.0)             |
| Geometry deviations                 |                        |                        |                        |                        |                        |
| Bond lengths (Å)                    | 0.016                  | 0.007                  | 0.010                  | 0.009                  | 0.011                  |
| Bond angles (°)                     | 1.4                    | 1.3                    | 1.5                    | 1.5                    | 1.5                    |
| No. of all protein atoms            | 2220                   | 2193                   | 2193                   | 2222                   | 2205                   |
| Mean B-values (Å <sup>2</sup> )     | 60.6                   | 54.7                   | 56.7                   | 59.6                   | 59.8                   |
| No. of ligand atoms                 | 85                     | 48                     | 66                     | 52                     | 51                     |
| Mean B-values (Å <sup>2</sup> )     | 53.1                   | 72.6                   | 64.7                   | 69.8                   | 69.4                   |
| No. of water molecules              | 82                     | 86                     | 145                    | 129                    | 90                     |
| Mean B-values (Å <sup>2</sup> )     | 66.7                   | 36.4                   | 56.1                   | 53.6                   | 72.6                   |
| Ramachandran plot (%)               |                        |                        |                        |                        |                        |
| Most favored                        | 92.3                   | 88.3                   | 90.7                   | 93.4                   | 93.0                   |
| Additionally allowed                | 7.3                    | 11.3                   | 8.2                    | 6.2                    | 6.6                    |
| Generously allowed                  | 0.4                    | 0.4                    | 1.2                    | 0.4                    | 0.4                    |

\*Values in the parentheses are for the highest resolution shells.
